# Supplementary material for: IDH1 mutation detection by droplet digital PCR in glioma
Source: PubMed Central journal article supplement (PMC4741852; doi:10.18632/oncotarget.5630), 2015-10-14
Supplement: oncotarget-06-39651-s001.pdf [file oncotarget-06-39651-s001.pdf]

## SUPPLEMENTARY TABLE

| No. | WHO grade | Gender | Age | KPS | Ending | Survival time (Days) | IDH1 mutation |
|-----|-----------|--------|-----|-----|--------|----------------------|---------------|
| 1   | 2         | 1      | 55  | 90  | 1      | 540                  | WT            |
| 2   | 2         | 1      | 33  | 90  | 1      | 1055                 | WT            |
| 3   | 2         | 1      | 43  | 90  | 1      | 1208                 | R132H         |
| 4   | 2         | 2      | 46  | 100 | 1      | 1879                 | R132H         |
| 5   | 2         | 2      | 25  | 10  | 1      | 2258                 | WT            |
| 6   | 2         | 1      | 17  | 60  | 0      | 2801                 | WT            |
| 7   | 2         | 2      | 43  | 70  | 0      | 2659                 | R132H         |
| 8   | 2         | 1      | 31  | 80  | 0      | 2654                 | R132H         |
| 9   | 2         | 2      | 56  | 90  | 0      | 2945                 | WT            |
| 10  | 2         | 1      | 35  | 60  | 0      | 1845                 | R132H         |
| 11  | 2         | 1      | 56  | 90  | 1      | 2856                 | R132H         |
| 12  | 2         | 1      | 37  | 90  | 1      | 2946                 | WT            |
| 13  | 2         | 2      | 44  | 100 | 0      | 3179                 | R132H         |
| 14  | 2         | 2      | 56  | 90  | 0      | 408                  | R132H         |
| 15  | 2         | 2      | 43  | 50  | 0      | 1463                 | R132H         |
| 16  | 2         | 1      | 4   | 100 | 0      | 3679                 | WT            |
| 17  | 2         | 2      | 2   | 90  | 0      | 3480                 | WT            |
| 18  | 2         | 2      | 35  | 70  | 0      | 315                  | WT            |
| 19  | 2         | 1      | 30  | 100 | 0      | 1060                 | R132H         |
| 20  | 2         | 2      | 30  | 80  | 1      | 4240                 | WT            |
| 21  | 3         | 1      | 35  | 80  | 1      | 158                  | WT            |
| 22  | 3         | 1      | 53  | 100 | 1      | 215                  | WT            |
| 23  | 3         | 1      | 54  | 70  | 1      | 232                  | WT            |
| 24  | 3         | 1      | 65  | 70  | 1      | 235                  | WT            |
| 25  | 3         | 1      | 33  | 80  | 1      | 250                  | WT            |
| 26  | 3         | 1      | 50  | 70  | 1      | 297                  | WT            |
| 27  | 3         | 1      | 31  | 80  | 1      | 333                  | R132H         |
| 28  | 3         | 1      | 58  | 70  | 1      | 357                  | WT            |
| 29  | 3         | 1      | 38  | 90  | 1      | 364                  | WT            |
| 30  | 3         | 1      | 32  | 60  | 1      | 371                  | WT            |
| 31  | 3         | 1      | 10  | 90  | 1      | 410                  | WT            |
| 32  | 3         | 2      | 43  | 60  | 1      | 412                  | R132H         |
| 33  | 3         | 1      | 9   | 80  | 1      | 415                  | WT            |
| 34  | 3         | 1      | 57  | 100 | 1      | 447                  | WT            |

(Continued)

| No. | WHO grade | Gender | Age | KPS | Ending | Survival time (Days) | IDH1 mutation |
|-----|-----------|--------|-----|-----|--------|----------------------|---------------|
| 35  | 3         | 2      | 59  | 50  | 1      | 457                  | WT            |
| 36  | 3         | 1      | 54  | 80  | 1      | 467                  | WT            |
| 37  | 3         | 1      | 65  | 80  | 1      | 495                  | WT            |
| 38  | 3         | 1      | 70  | 90  | 1      | 766                  | R132H         |
| 39  | 3         | 1      | 60  | 90  | 1      | 771                  | WT            |
| 40  | 3         | 2      | 47  | 80  | 1      | 793                  | R132H         |
| 41  | 3         | 2      | 37  | 90  | 1      | 1107                 | WT            |
| 42  | 3         | 1      | 30  | 90  | 1      | 1149                 | R132H         |
| 43  | 3         | 1      | 57  | 60  | 1      | 1569                 | WT            |
| 44  | 3         | 2      | 44  | 90  | 1      | 2322                 | R132H         |
| 45  | 3         | 1      | 39  | 70  | 0      | 97                   | R132H         |
| 46  | 3         | 1      | 39  | 80  | 0      | 592                  | WT            |
| 47  | 3         | 2      | 49  | 60  | 0      | 3015                 | R132H         |
| 48  | 3         | 2      | 33  | 80  | 0      | 3032                 | WT            |
| 49  | 3         | 1      | 19  | 90  | 0      | 2254                 | WT            |
| 50  | 3         | 1      | 17  | 90  | 0      | 866                  | WT            |
| 51  | 4         | 1      | 56  | 90  | 1      | 69                   | WT            |
| 52  | 4         | 2      | 41  | 60  | 1      | 299                  | WT            |
| 53  | 4         | 2      | 74  | 80  | 1      | 301                  | WT            |
| 54  | 4         | 2      | 26  | 90  | 1      | 313                  | WT            |
| 55  | 4         | 1      | 52  | 90  | 1      | 363                  | WT            |
| 56  | 4         | 1      | 44  | 100 | 1      | 397                  | WT            |
| 57  | 4         | 1      | 29  | 90  | 1      | 523                  | R132H         |
| 58  | 4         | 1      | 21  | 80  | 1      | 830                  | WT            |
| 59  | 4         | 1      | 8   | 50  | 1      | 1485                 | WT            |
| 60  | 4         | 2      | 51  | 80  | 0      | 2205                 | WT            |
| 61  | 4         | 1      | 44  | 60  | 0      | 1614                 | WT            |
| 62  | 4         | 1      | 56  | 50  | 0      | 2584                 | WT            |

Gender: 1, female, 2, male

Ending: 1, dead, 0, alive.
